# Supplementary material for: Measurement Report: Size-resolved secondary organic aerosol formation modulated by aerosol water uptake in wintertime haze
Source: Copernicus journal article supplement (doi:10.5194/egusphere-2024-573), 2024-02-29
Supplement: Supplementary file 1 [file egusphere-2024-573-supplement.pdf]

**Supplement of:**

**Measurement Report: Size-resolved secondary organic aerosol formation modulated by aerosol water uptake in wintertime haze**

Jing Duan<sup>1</sup>, Ru-Jin Huang<sup>1,2</sup>, Ying Wang<sup>1</sup>, Wei Xu<sup>3</sup>, Haobin Zhong<sup>4</sup>, Chunshui Lin<sup>1</sup>, Wei, Huang<sup>1</sup>, Yifang Gu<sup>1</sup>, Jurgita Ovadnevaite<sup>5</sup>, Darius Ceburnis<sup>5</sup>, Colin O'Dowd<sup>5</sup>

<sup>1</sup>State Key Laboratory of Loess and Quaternary Geology (SKLLQG), Center for Excellence in Quaternary Science and Global Change, Institute of Earth Environment, Chinese Academy of Sciences, Xi'an 710061, China

<sup>2</sup>University of Chinese Academy of Sciences, Beijing 100049, China

<sup>3</sup>Center for Excellence in Regional Atmospheric Environment, Institute of Urban Environment, Chinese Academy of Sciences, Xiamen, China

<sup>4</sup>School of Advanced Materials Engineering, Jiaying Nanhu University, Jiaying, 314001, China

<sup>5</sup>School of Physics and Centre for Climate and Air Pollution Studies, Ryan Institute, University of Galway, University Road, Galway, H91CF50, Ireland

**Correspondence:** Ru-Jin Huang (rujin.huang@ieecas.cn)

**Table S1** A summary of size ranges of 10 bins in the range of 80 – 2500 nm.

| Bin number | Size (nm) |
|------------|-----------|
| Bin1       | 80-112    |
| Bin2       | 112-159   |
| Bin3       | 159-225   |
| Bin4       | 225-317   |
| Bin5       | 317-447   |
| Bin6       | 447-631   |
| Bin7       | 631-890   |
| Bin8       | 890-1256  |
| Bin9       | 1256-1772 |
| Bin10      | 1772-2500 |

**Table S2** Evaluation of random forest regression model.

| campaign         | Size (nm) | RMSE <sup>a</sup> | R <sup>2b</sup> |
|------------------|-----------|-------------------|-----------------|
| winter 2013-2014 | 112-159   | 0.126             | 0.01            |
|                  | 159-225   | 0.034             | 0.63            |
|                  | 225-317   | 0.036             | 0.60            |
|                  | 317-447   | 0.049             | 0.73            |
|                  | 447-631   | 0.043             | 0.74            |
|                  | 631-890   | 0.068             | 0.69            |
|                  | 890-1256  | 0.052             | 0.67            |
|                  | 1256-1772 | 0.076             | 0.36            |
| winter 2018-2019 | 112-159   | 0.196             | 0.09            |
|                  | 159-225   | 0.108             | 0.30            |
|                  | 225-317   | 0.075             | 0.54            |
|                  | 317-447   | 0.075             | 0.53            |
|                  | 447-631   | 0.066             | 0.61            |
|                  | 631-890   | 0.057             | 0.71            |
|                  | 890-1256  | 0.053             | 0.80            |
|                  | 1256-1772 | 0.074             | 0.75            |

<sup>a</sup> RMSE (Root mean square error) is the square root of the expected squared difference between the predicted and observed values.

<sup>b</sup>R<sup>2</sup> is the correlation between the observed and random forest predicted SOA%.

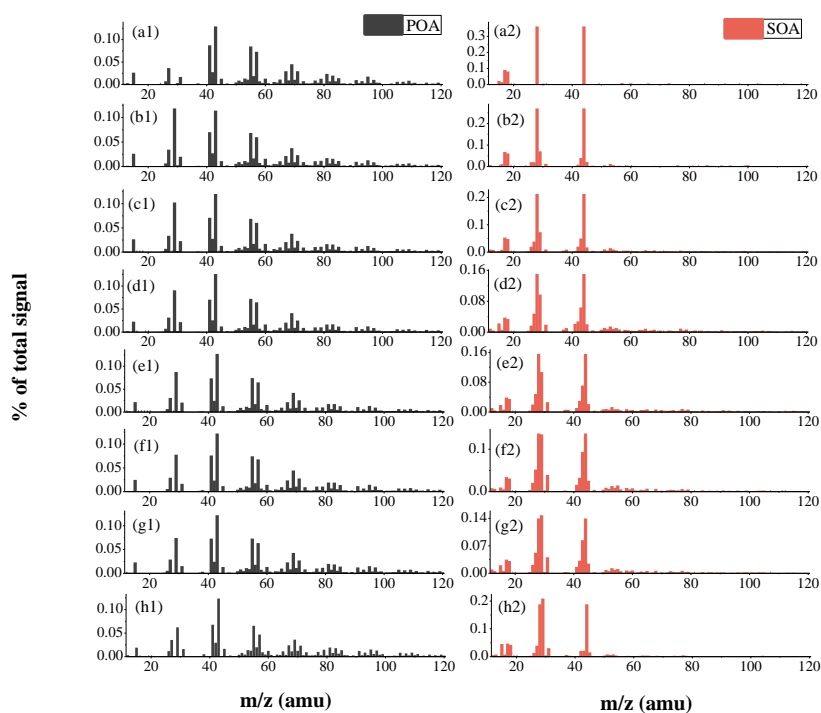

**Figure S1.** Mass spectra of (a1-h1) POA, (a2-h2) SOA under different size ranges of 112-159 nm, 159-225 nm, 225-317 nm, 317-447 nm, 447-631 nm, 631-890 nm, 890-1256 nm, and 1256-1772 nm, respectively, in winter 2013-2014 in Xi'an.

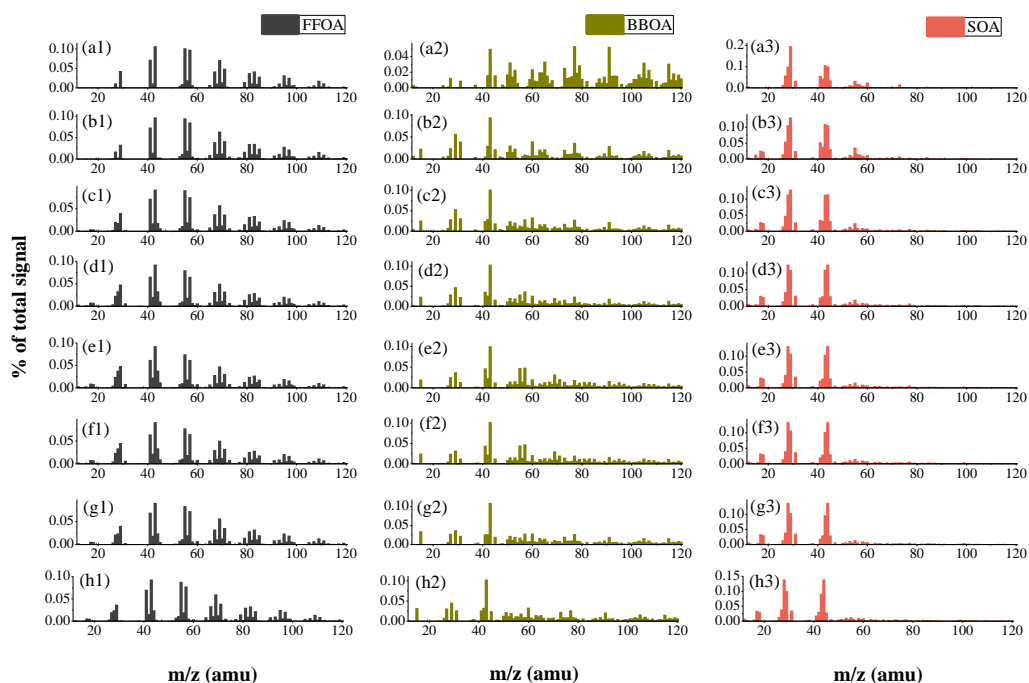

**Figure S2.** Mass spectra of (a1-h1) FFOA, (a2-h2) BBOA, and (a3-h3) SOA under different size ranges of 112-159 nm, 159-225 nm, 225-317 nm, 317-447 nm, 447-631 nm, 631-890 nm, 890-1256 nm, and 1256-1772 nm, respectively, in winter 2018-2019 in Xi'an.

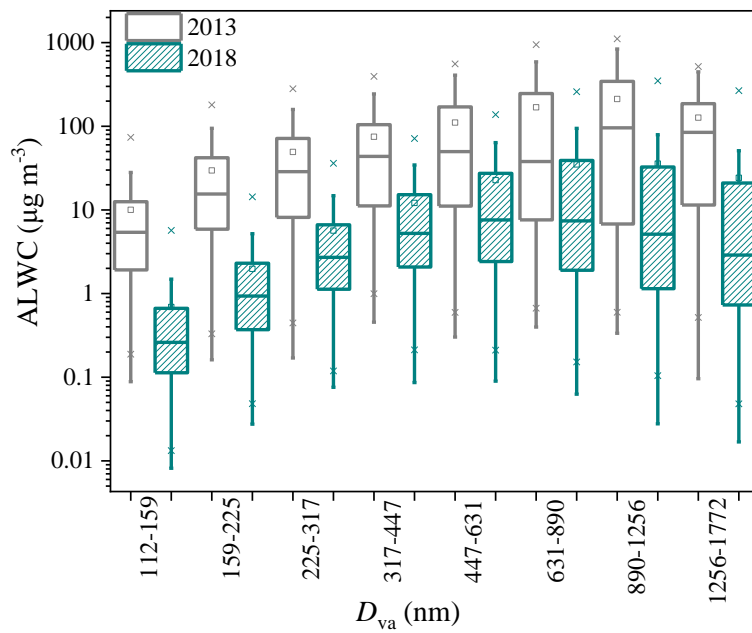

**Figure S3.** Size distribution of ALWC between winter 2013-2014 and winter 2018-2019 in Xi'an.

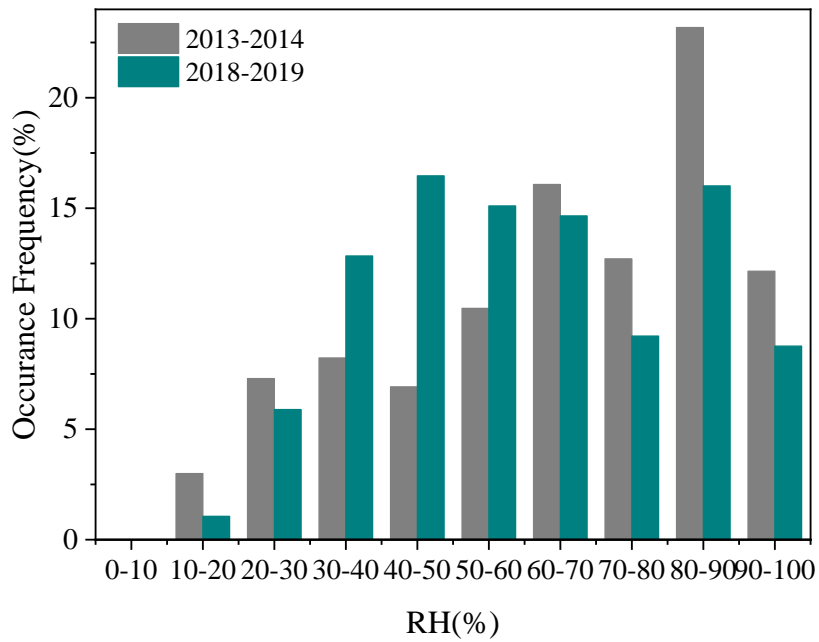

**Figure S4.** Distribution frequency of RH between winter 2013-2014 and winter 2018-2019 in Xi'an.

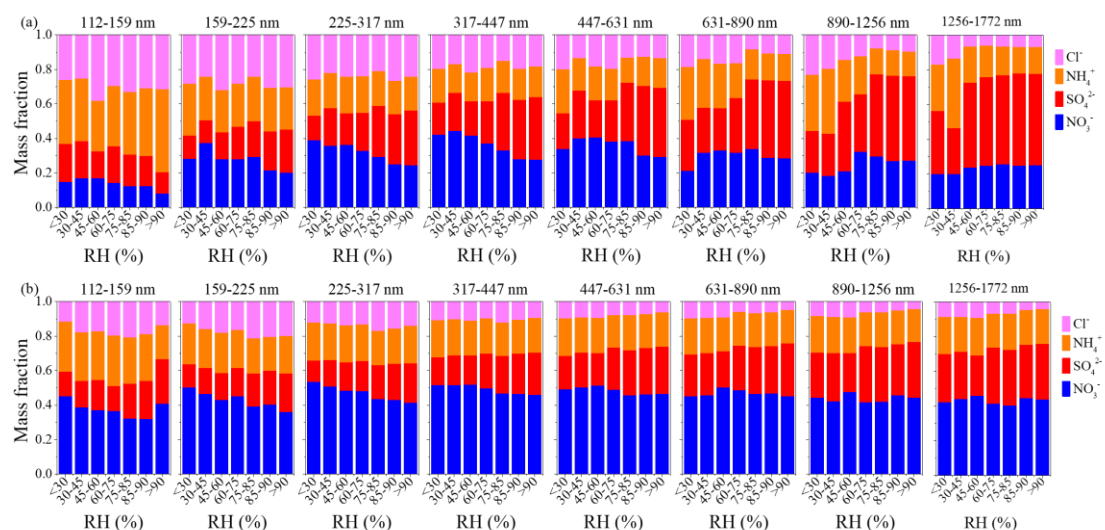

**Figure S5.** Mass composition of inorganic species under different size ranges and RH ranges between winter 2013-2014 (a) and winter 2018-2019 (b).

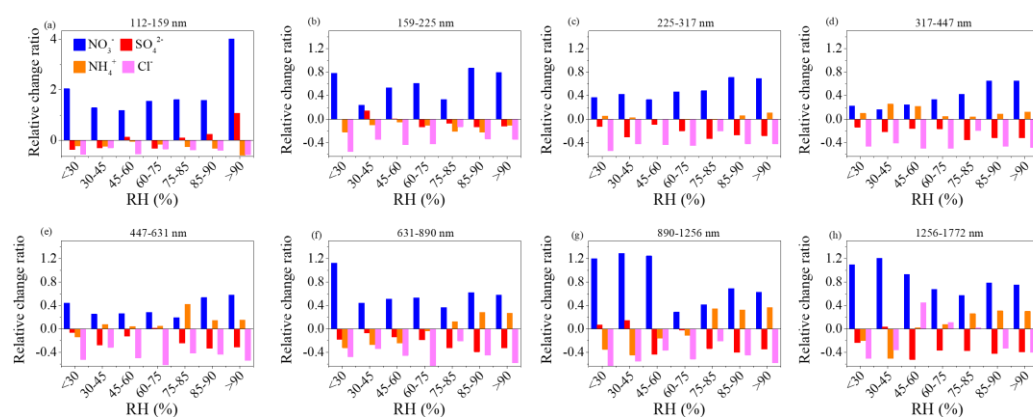

**Figure S6.** Relative changes of mass fraction of  $\text{NO}_3^-$ ,  $\text{SO}_4^{2-}$ ,  $\text{NH}_4^+$ , and  $\text{Cl}^-$  in total inorganic aerosol in winter 2018-2019, compared to winter 2013-2014 under different size ranges.
